# Supplementary material
Source: publisher site journal article supplement (https://www.dovepress.com/article/362204)
Supplement: Supplementary file 1 [file get_supplementary_file.php]

**Supplemental Material**

**The PubMed search strategy will employ the following terms (yielded 1,381 hits on 3-29-21):**

1. ("peripheral nerve stimulation"[Title/Abstract] OR "peripheral nerve stimulator"[Title/Abstract] OR "occipital nerve stimulation"[Title/Abstract] OR "occipital nerve stimulator"[Title/Abstract] OR "peripheral nerve neuromodulation"[Title/Abstract] OR "peripheral field stimulation"[Title/Abstract] OR "peripheral neuromodulation"[Title/Abstract] OR "peripheral neurostimulation"[Title/Abstract]) AND (english[Filter])
2. ("peripheral nerve stimulation"[Title/Abstract] OR "peripheral nerve stimulator"[Title/Abstract] OR "occipital nerve stimulation"[Title/Abstract] OR "occipital nerve stimulator"[Title/Abstract] OR "peripheral nerve neuromodulation"[Title/Abstract] OR "peripheral field stimulation"[Title/Abstract] OR "peripheral neuromodulation"[Title/Abstract] OR "peripheral neurostimulation"[Title/Abstract]) AND ((review[Filter] OR systematicreview[Filter]) AND (english[Filter]))
3. #1 NOT #2

**The Scopus search strategy will employ the following terms (yielded 1,480 hits on 3-29-21):**

1. TITLE-ABS("peripheral nerve stimulation" or "peripheral nerve stimulator" or "occipital nerve stimulation" or "occipital nerve stimulator" or "peripheral nerve neuromodulation" OR "peripheral field stimulation" OR "peripheral neuromodulation" OR "peripheral neurostimulation") AND ( LIMIT-TO ( DOCTYPE,"ar" ) OR LIMIT-TO ( DOCTYPE,"le" ) )
2. LANGUAGE(english)
3. 1 and 2
4. TITLE(review)
5. 3 and not 4

**The Cochrane search strategy will employ the following terms (yielded 276 hits on 3-29-21):**

Database(s): EBM Reviews - Cochrane Central Register of Controlled Trials February 2021
Search Strategy:

|  |  |  |
| --- | --- | --- |
| 1 | ("occipital nerve stimulation" or "occipital nerve stimulator" or "peripheral field stimulation" or "peripheral nerve neuromodulation" or "peripheral nerve stimulation" or "peripheral nerve stimulator" or "peripheral neuromodulation" or "peripheral neurostimulation").ti,ab,kw. |  |
| 2 | limit 1 to english language |  |
| 3 | limit 2 to ("review" or "review literature" or "review of reported cases" or review, academic or review, multicase or review, tutorial) |  |
| 4 | 2 not 3 |  |
|  |  |  |

**The Web of Science search strategy will employ the following terms (yielded 674 hits on 3-29-21):**

((TI=(("occipital nerve stimulation" OR "occipital nerve stimulator" OR "peripheral field stimulation" OR "peripheral nerve neuromodulation" OR "peripheral nerve stimulation" OR "peripheral nerve stimulator" OR "peripheral neuromodulation" OR "peripheral neurostimulation"))) AND LA=(English)) NOT DT=(Review)
